# Supplementary material for: Short-lived detection of an introduced vertebrate eDNA signal in a nearshore rocky reef environment
Source: PLoS One. 2021 Jun 4;16(6):e0245314. doi: 10.1371/journal.pone.0245314 (PMC8177635; doi:10.1371/journal.pone.0245314)
Supplement: S3 Table — (XLSX) [file pone.0245314.s009.xlsx]

## Sheet: Table S3
	S3 Table. Touchdown PCR thermal profile.
	Denaturation			TD Cycle 1			TD Cycle 2			TD Cycle 3			TD Cycle 4
		Temp	Time		Temp	Time		Temp	Time		Temp	Time		Temp	Time
	Denature	95 C	10 min	Denature	94 C	30 s	Denature	94 C	30 s	Denature	94 C	30 s	Denature	94 C	30 s
	Anneal			Anneal	69.5 C	30 s	Anneal	68 C	30 s	Anneal	66.5 C	30 s	Anneal	65 C	30 s
	Extension			Extension	72 C	90 s	Extension	72 C	90 s	Extension	72 C	90 s	Extension	72 C	90 s
	Cycles			Cycles			Cycles			Cycles			Cycles
	TD Cycle 5			TD Cycle 6			TD Cycle 7			TD Cycle 8			TD Cycle 9
		Temp	Time		Temp	Time		Temp	Time		Temp	Time		Temp	Time
	Denature	94 C	30 s	Denature	94 C	30 s	Denature	94 C	30 s	Denature	94 C	30 s	Denature	94 C	30 s
	Anneal	63.5 C	30 s	Anneal	62 C	30 s	Anneal	60.5 C	30 s	Anneal	59 C	30 s	Anneal	57.5 C	30 s
	Extension	72 C	90 s	Extension	72 C	90 s	Extension	72 C	90 s	Extension	72 C	90 s	Extension	72 C	90 s
	Cycles			Cycles			Cycles			Cycles			Cycles
	TD Cycle 10			TD Cycle 11			TD Cycle 12			TD Cycle 13			TD Cycle 14
		Temp	Time		Temp	Time		Temp	Time		Temp	Time		Temp	Time
	Denature	94 C	30 s	Denature	94 C	30 s	Denature	94 C	30 s	Denature	94 C	30 s	Denature	94 C	30 s
	Anneal	56 C	30 s	Anneal	54.5 C	30 s	Anneal	53 C	30 s	Anneal	51.5 C	30 s	Anneal	50 C	30 s
	Extension	72 C	90 s	Extension	72 C	90 s	Extension	72 C	90 s	Extension	72 C	90 s	Extension	72 C	90 s
	Cycles			Cycles			Cycles			Cycles			Cycles
	Main Cycle						Final Extension
		Temp	Time		Temp	Time		Temp	Time
	Denature	94 C	30 s	Denature			Denature
	Anneal	50 C	30 s	Anneal			Anneal
	Extension	72 C	45 s	Extension	72 C	10 min	Extension	4	infitine
	Cycles		25	Cycles			Cycles
